# Supplementary material for: Intense Exercise and Aerobic Conditioning Associated with Chromium or L-Carnitine Supplementation Modified the Fecal Microbiota of Fillies
Source: PLoS One. 2016 Dec 9;11(12):e0167108. doi: 10.1371/journal.pone.0167108 (PMC5147854; doi:10.1371/journal.pone.0167108)
Supplement: S2 Table — (XLSX) [file pone.0167108.s002.xlsx]

## Sheet: Lactato
1º Teste incremental - lactatemia
Animal	Basal	Aque	4	5	6	7	8	9	10	11	Final	5' Rec	30' Rec	60' Rec	120' Rec	Limiar Lactato (m/s)
Habanera	0.552	0.73	1.92	3.62	6.02	6.41	10.6	18.8	23.6	**	22.8	23.9	20.4	15	5.01	7
Observadora	0.752	0.637	1.18	2.41	5.14	9.06	14.3	17.3	**	**	15	12.8	8.45	5.66	1.8	4.83
Oligarquia	0.702	0.866	1.38	2.72	6.55	10.2	15.2	17.7	**	**	14.6	12.2	8.69	3.41	2.41	4.83
Média Exercício	0.668667	0.744333	1.49333	2.91667	5.90333	8.55667	13.3667	17.9333	23.6	**	17.4667	16.3	12.5133	8.02333	3.07333	5.55333
3 - Heresia	0.683	2.46	4.61	7.37	10.3	13.2	15.2	18.7	22	**	20.9	19.6	14.2	5.49	2.29	4.23
4 - Obarana	0.56	0.526	1.06	1.8	4.17	6.86	10.2	13.6	**	**	10.5	9.86	5.03	2.57	**	5
10 - Odosseia	0.612	0.75	0.995	1.82	3.63	9.15	15.4	17.5	19.1	19.6	19	18.1	10.4	7.65	2.46	5.83
Média LC	0.618333	1.24533	2.22167	3.66333	6.03333	9.73667	13.6	16.6	20.55	19.6	16.8	15.8533	9.87667	5.23667	2.375	5.02
5 - Obediência	0.463	0.711	1.77	3.31	5.62	6.33	11.867	16.8	**	**	14.5	11.8	7.15	3.7	**	6.83
6 - Objetiva	0.682	0.799	1.68	2.77	5.07	6.84	10.4	14.8	**	**	14.1	13.2	9.81	5.8	2.5	4.5
15 - Quadrilha	0.999	0.85	1.06	1.55	2.29	7.68	12.3	14.6	17.5	**	17.1	13.2	5.81	3.42	1.52	5.77
Média Cr	0.714667	0.786667	1.50333	2.54333	4.32667	6.95	11.5223	15.4	17.5	**	15.2333	12.7333	7.59	4.30667	2.01	5.7
Média total	0.667222	0.925444	1.73944	3.04111	5.42111	8.41444	12.8297	16.6444	20.55	19.6	16.5	14.9622	9.99333	5.85556	2.57	5.42444
2º Teste incremental - lactatemia
Animal	Basal	Aque	4	5	6	7	8	9	10	11	Final	5' Rec	30' Rec	60' Rec	120' Rec	Limiar Lactato (m/s)
1 - Habanera	0.715	0.518	0.736	1.62	2.7	4.53	7.27	10.8	15.6	**	13.5	13.3	8.28	3.87	1.27	6
7 - Observadora	1.7	0.675	0.917	2.02	3.64	7.25	8.07	13.3	13	**	10.7	9.22	5.02	3.64	1.77	6
11 - Oligarquia	1.04	0.655	1	2.05	5.12	8.9	13.7	**	**	**	13.5	13.4	7.7	3.79	1.77	5
Média exercício	1.15167	0.616	0.884333	1.89667	3.82	6.89333	9.68	12.05	14.3	**	12.5667	11.9733	7	3.76667	1.60333	5.66667
3 - Heresia	1.3	0.585	0.786	1.5	2.93	5.06	7.8	11.4	13.9	**	10.2	10.1	5.15	2.3	1.38	5.2
4 - Obarana	1.37	0.656	1.08	2.14	4.72	8.02	9.57	12.6	11.9	**	9.45	8.36	4.23	2.3	1.89	4.9
10 - Odosseia	1.15	0.654	1.13	2.46	4.92	7.66	9.96	13	14.1	**	13	11.8	8.62	3.35	1.53	5
Média LC	1.27333	0.631667	0.998667	2.03333	4.19	6.91333	9.11	12.3333	13.3	**	10.8833	10.0867	6	2.65	1.6	5.03333
5 - Obediência	1.3	0.601	1.4	2.58	4.43	6.08	8.68	12.6	15.12	**	11.8	9.61	6.81	3.41	1.6	5.75
6 - Objetiva	0.997	0.859	1.52	2.83	4.87	9.01	12.4	18.5	21.5	**	21.1	20.8	12.2	6.83	3.64	5.5
15 - Quadrilha	1.34	0.62	1.09	2.233	5.26	6.18	9.75	16.6	20.9	**	18.3	17.7	12.4	6.08	1.27	6.5
Média Cr	1.21233	0.693333	1.33667	2.54767	4.85333	7.09	10.2767	15.9	19.1733	**	17.0667	16.0367	10.47	5.44	2.17	5.91667
Média total	1.21244	0.647	1.07322	2.15922	4.28778	6.96556	9.68889	13.6	15.7525	#DIV/0!	13.5056	12.6989	7.82333	3.95222	1.79111	5.53889

## Sheet: Fadiga
	Tempo até a fadiga (segundos)		Frequência cardíaca na fadiga (bpm)
Animal	Teste 1	Teste 2	Teste 1	Teste 2
Habanera	1736	1822	195	214
Observadora	1628	1717	214	223
Oligarquia	1531	1486	229	233
Média Exercício	1631.67	1675	212.667	223.333
Heresia	1762	1736	203	213
Obarana	1626	1699	216	210
Odosseia	1874	1756	198	207
Média LC	1754	1730.33	205.667	210
Obediência	1648	1778	217	200
Objetiva	1376	1729	208	206
Quadrilha	1739	1778	221	222
Média Cr	1587.67	1761.67	215.333	209.333
Média total	1657.78	1722.33	211.222	214.222
DADOS TESTE PROGRESSIVO NA ESTEIRA (LILIAN)

## Sheet: Teste de Marcha
1º Teste de Marcha - C - 10 e 11/08/2013 - FREQUÊNCIA CARDÍACA (bpm)
Animal	Basal	Aque	5'	10'	15'	20'	25'	30'	Final	5' Rec	30' Rec	60' Rec
Habanera	39	68	128	129	130	131	134	132	94	52	50	37
Observadora	54	89	110	119	122	123	126	125	104	51	40	40
Oligarquia	52	78	87	136	145	146	148	149	124	67	39	41
Média exercício	48.3333	78.3333	108.333	128	132.333	133.333	136	135.333	107.333	56.6667	43	39.3333
Heresia	53	71	99	124	126	130	133	132	106	59	48	44
Obarana	52	85	112	125	119	122	124	126	110	63	41	48
Odosseia	54	80	126	138	139	134	128	128	100	53	46	48
Média LC	53	78.6667	112.333	129	128	128.667	128.333	128.667	105.333	58.3333	45	46.6667
Obediência	64	76	113	119	49	116	119	121	86	46	38	32
Objetiva	44	#REF!	#REF!	#REF!	#REF!	#REF!	#REF!	#REF!	#REF!	60	66	45
Quadrilha	42	61	67	100	118	133	138	140	119	57	47	66
Média Cr	50	#REF!	#REF!	#REF!	#REF!	#REF!	#REF!	#REF!	#REF!	54.3333	50.3333	47.6667
Média total	50.4444	#REF!	#REF!	#REF!	#REF!	#REF!	#REF!	#REF!	#REF!	56.4444	46.1111	44.5556
3º Teste de Marcha - E - 14 e 15/09/2013 - FREQUÊNCIA CARDÍACA (bpm)
Animal	Basal	Aque	5'	10'	15'	20'	25'	30'	Final	5' Rec	30' Rec	60' Rec
Habanera	45	64	99	101	104	107	108	107	84	41	36	40
Observadora	65	74	114	120	121	125	126	127	97	57	42	44
Oligarquia	45	109	97	89	93	94	103	89	122	51	48	48
Média Exercício	51.6667	82.3333	103.333	103.333	106	108.667	112.333	107.667	101	49.6667	42	44
Heresia	45	94	123	120	121	119	118	118	88	57	44	49
Obarana	50	82	127	128	125	128	129	130	99	51	40	36
Odosseia	45	68	90	123	125	129	129	128	98	53	41	39
Média LC	46.6667	81.3333	113.333	123.667	123.667	125.333	125.333	125.333	95	53.6667	41.6667	41.3333
Obediência	39	63	95	110	114	116	121	119	94	48	39	36
Objetiva	42	74	125	129	130	130	128	129	95	55	44	48
Quadrilha	47	60	55	50	56	52	49	84	119	52	49	42
Média Cr	42.6667	65.6667	91.6667	96.3333	100	99.3333	99.3333	110.667	102.667	51.6667	44	42
Média total	40.1026	65.5128	87.8205	92.0769	93.7436	94.9231	96.0513	97.2308	84	43.7179	35.8974	35.9487

## Sheet: Simpson
inverse Simpson's							inverse Simpson's
Groups/fillies	Moments						Total exercise group (ET)	IET-1-0	IET-1-48	IET-2-0	IET-2-48
Exercise (E)	IET-1-0	IET-1-48	IET-2-0	IET-2-48			1	29.3152	108.463	25.9529	45.1838
1	29.3152	108.463	25.9529	45.1838			2	35.5173	73.3721	56.5748	104.907
2	35.5173	73.3721	56.5748	104.907			3	50.69	73.992	64.1775	10.2016
3	50.69	73.992	64.1775	10.2016			4	109.625	46.2789	53.0116	63.958
L-Carnitine (Car)							5	133.148	102.933	122.541	64.7285
4	109.625	46.2789	53.0116	63.958			6	149.556	87.1533	78.6745	47.2883
5	133.148	102.933	122.541	64.7285			7	73.0483	57.5765	96.5527	89.3119
6	149.556	87.1533	78.6745	47.2883			8	73.1568	94.9837	84.7568	35.4148
Chromium (Cr)							9	83.2502	83.2502	135.585	67.6353
7	73.0483	57.5765	96.5527	89.3119
8	73.1568	94.9837	84.7568	35.4148
9	83.2502	83.2502	135.585	67.6353
Control
10	54.261	113.791	48.3543	106.422
11	87.8685	76.0929	90.0184	113.649
12	92.5941	46.8764	63.4996	67.6377

## Sheet: Catchall
	Catchall							Catchall
	Groups/fillies	Moments						Total exercise group (ET)	IET-1-0	IET-1-48	IET-2-0	IET-2-48
	Exercise (E)	IET-1-0	IET-1-48	IET-2-0	IET-2-48			1	3495.4	4710.1	6622.3	6688.4
	1	3495.4	4710.1	6622.3	6688.4			2	5361.5	5038.5	2919.7	2643.2
	2	5361.5	5038.5	2919.7	2643.2			3	5216.2	7815.6	4079.1	2746.5
	3	5216.2	7815.6	4079.1	2746.5			4	5397.6	8301.8	2346.5	4422.5
	L-Carnitine (Car)							5	4618.1	5046.5	7753.3	6870.9
	4	5397.6	8301.8	2346.5	4422.5			6	6693.7	4877.2	5535.9	5921.3
	5	4618.1	5046.5	7753.3	6870.9			7	8566.9	4875.4	6199.8	5328.7
	6	6693.7	4877.2	5535.9	5921.3			8	4973.7	5180.1	3718	8459.6
	Chromium (Cr)							9	6291.1	5940.4	7763	3988.6
	7	8566.9	4875.4	6199.8	5328.7
	8	4973.7	5180.1	3718	8459.6
	9	6291.1	5940.4	7763	3988.6
	Control
	10	4705	4522	5171.6	5894.5
	11	4575.9	7807.4	4755.2	6945
	12	5154	4778.9	5583.9	3507.5
